# Supplementary material for: Conserved Epigenetic Mechanisms Could Play a Key Role in Regulation of Photosynthesis and Development-Related Genes during Needle Development of Pinus radiata
Source: PubMed Central journal article supplement (PMC4429063; doi:10.1371/journal.pone.0126405), 2015-05-12
Supplement: pone.0126405.s002.pdf [file pone.0126405.s002.pdf]

**Figure S2**

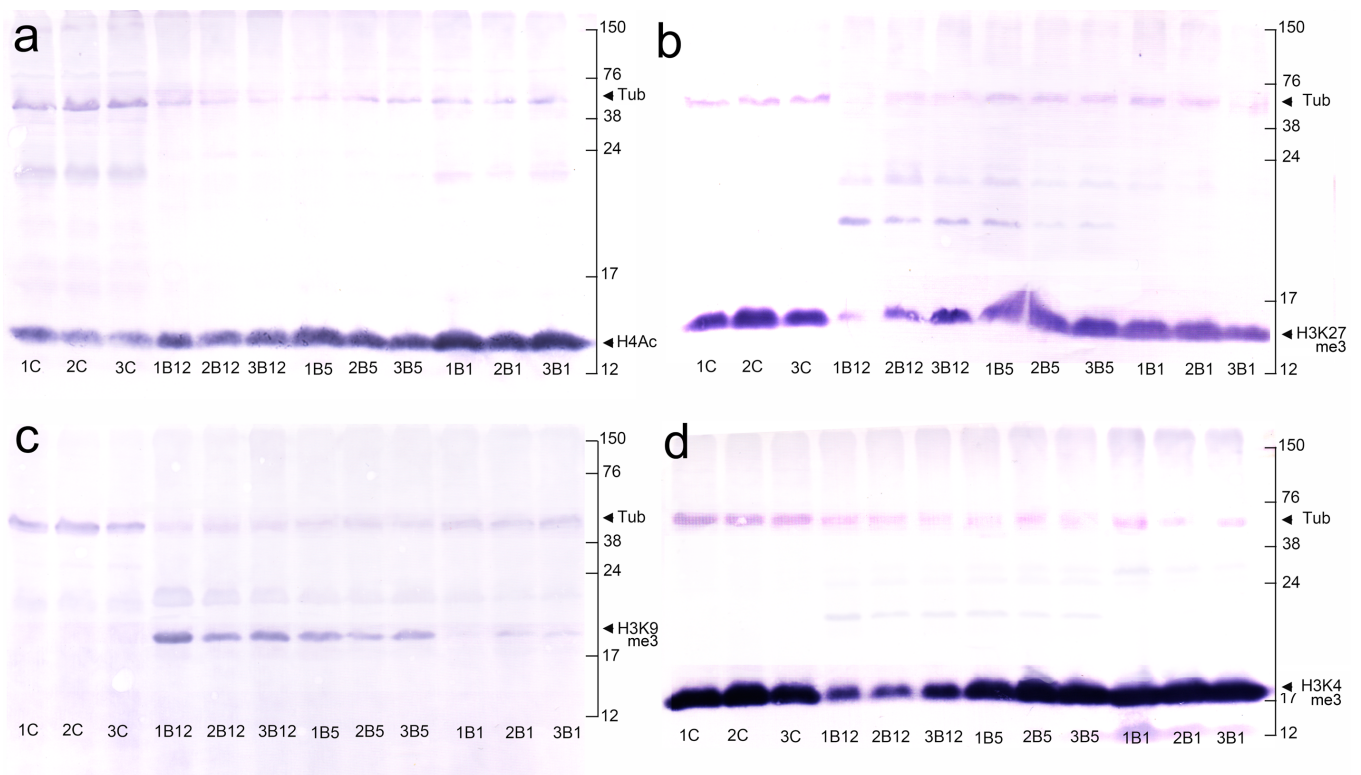

**Figure S2:** Representative blots showing the identification and quantification of (a) Acetylated Histone H4, (b) H3K27me3, (c) H3K9me3, and (d) H3K4me3 by immunoblotting on protein extracts from calli (C), mature (B12), growing (B5), and immature (B1) needles. Band intensities were normalized against Tubulin (Tub).
