# Supplementary material for: Conserved Epigenetic Mechanisms Could Play a Key Role in Regulation of Photosynthesis and Development-Related Genes during Needle Development of Pinus radiata
Source: PubMed Central journal article supplement (PMC4429063; doi:10.1371/journal.pone.0126405), 2015-05-12
Supplement: pone.0126405.s003.pdf [file pone.0126405.s003.pdf]

**Figure S3**

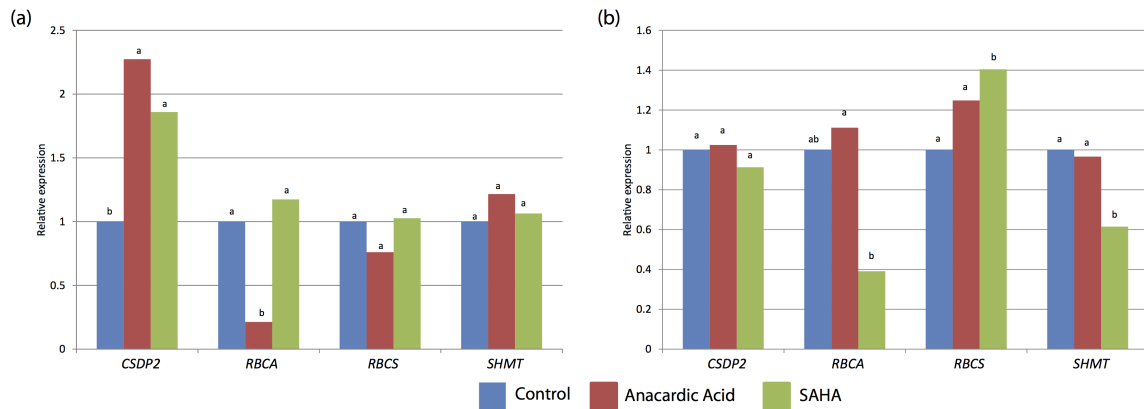

**Figure S3:** Analysis of the Relative Quantity (RQ) of PrCSDP2, PrRBCA, PrRBCS, and PrSHMT4 expression levels in (a) *P. radiata* calli and (b) needles after co cultivation with AnAc and SAHA. Expression levels were normalized to values in controls (untreated calli or needles). Different letters indicate significant differences between developmental stages (Tukey HSD test;  $p < 0.05$ ).
