# Supplementary material for: Conserved Epigenetic Mechanisms Could Play a Key Role in Regulation of Photosynthesis and Development-Related Genes during Needle Development of Pinus radiata
Source: PubMed Central journal article supplement (PMC4429063; doi:10.1371/journal.pone.0126405), 2015-05-12
Supplement: pone.0126405.s004.pdf [file pone.0126405.s004.pdf]

Figure S4

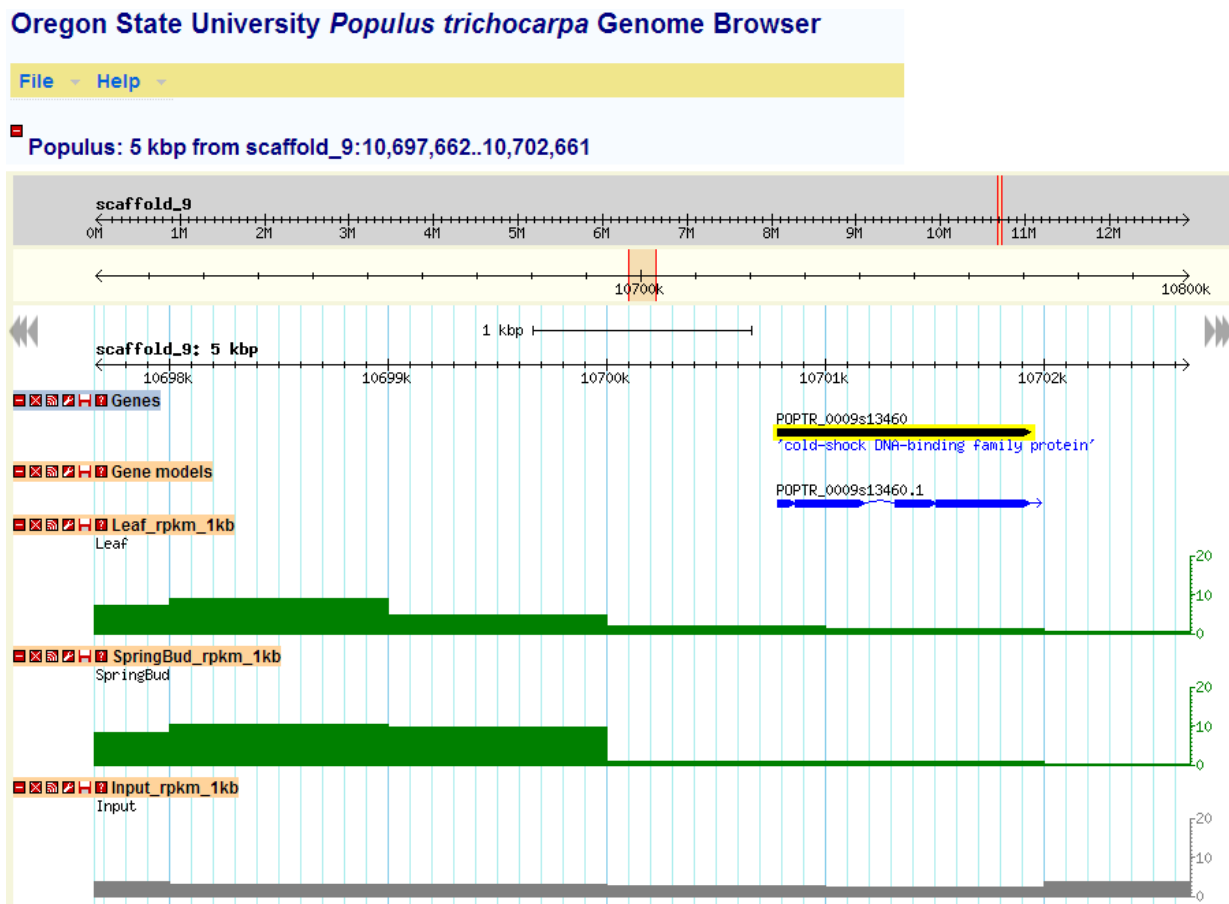

**Figure S3:** Differential DNA methylation found in the promoter of the locus POPTR\_0009s13460, ortholog of *PrCSDP2*, when comparing leaf and apical buds. Poplar methylome (Vining *et al.*, 2012) was visualized using gbrowse available at the Oregon State University (<http://poplar.cgrb.oregonstate.edu/cgi-bin/gbrowse/Populus/>; landmark: scaffold\_9:10697662..10702661). The specific locus corresponding to POPTR\_0009s13460 was defined after BLASTing the *PrCSDP2* partial sequence to *Populus trichocarpa* genome v3 available at Phytozome (<http://www.phytozome.net>).

#### References:

Vining K, Pomraning K, Wilhelm L, Priest H, Pellegrini M, Mockler T, Freitag M, Strauss S. 2012. Dynamic DNA cytosine methylation in the *Populus trichocarpa* genome: tissue-level variation and relationship to gene expression. *BMC Genomics* **13**(1): 27.
