# Supplementary material for: Conserved Epigenetic Mechanisms Could Play a Key Role in Regulation of Photosynthesis and Development-Related Genes during Needle Development of Pinus radiata
Source: PubMed Central journal article supplement (PMC4429063; doi:10.1371/journal.pone.0126405), 2015-05-12
Supplement: pone.0126405.s006.pdf [file pone.0126405.s006.pdf]

**Table S1:** List of employed primers for Bisulfite sequencing, qRT-PCR, and ChIP analyses.

| Gene                     | Forward (5'→3')                    | Reverse (5'→3')                    | T <sub>m</sub> |
|--------------------------|------------------------------------|------------------------------------|----------------|
|                          | <b>Bisulfite sequencing</b>        |                                    |                |
| Pr <i>CSDP2</i> -Outer   | GGGTTATGGTTTTATAATTTYTGATG         | TCCCACCCACCRCCACC                  | 60             |
| Pr <i>CSDP2</i> -Inner   | CCRRAAAGGTAAAGTGTT                 | RAACCACCACCTCTTCRATTC              | 52             |
|                          | <b>RT-qPCR</b>                     |                                    |                |
| <i>18S</i>               | GCGAAAGCATTTGCCAAGG                | ATTCCTGGTCGGCATCGTTA               | 58             |
| <i>ACTIN</i>             | CACTGCACTTGCTCCCAGTA               | AACCTCCGATCCAAACACTG               | 58             |
| <i>GAPDH</i>             | AAGATCCTCGGGAAAGGAGA               | CTTCCTTGCTCAATGCAACA               | 58             |
| Pr <i>RBCS</i>           | GGAACCATCTCGAGGAGTA                | CTCTGTGCACCCAACATC                 | 58             |
| Pr <i>RBCA</i>           | CAAGGAGCAATAGGCATCTA               | AGATGAGCCCAGTCTTTCTC               | 58             |
| Pr <i>SHM4</i>           | AACTGCGTTCTTGTTGATTG               | CTTGATGAACGAGGGATACA               | 58             |
| Pr <i>CSDP2</i>          | TTTCATAACCCCTGATGATG               | ATCTAGGGCCTTGTTCTTC                | 58             |
|                          | <b>ChIP</b>                        |                                    |                |
| Pr <i>CSDP2</i> Promoter | ATTAATAATAAAGCACATGGGGAGAAA<br>TAA | AAATATATGTACGTATGGTAGAAAGG<br>AGGT | 60             |
| Pr <i>CSDP2</i> 1st Exon | GAGGGATTCTGAACCATGTCTG             | CGTGTACTCGACGGCCTCT                | 60             |
| Pr <i>RBCA</i> Promoter  | ACTGTTAGCTCCATCACTGTCTCC           | GCTTGCTCTCATCAATTCAGC              | 60             |
| Pr <i>RBCA</i> 1st Exon  | TTTTTCCTATATAATCAGAAGCAATAAC<br>TG | TAAATACATAATTGAGGAGCTCAGTA<br>AGTC | 60             |
| Pr <i>RBCS</i> Promoter  | GTGAGCTGCACCAGACAAAGC              | TCTCAGGTGAGTAACCAGCATCAG           | 61             |
| Pr <i>RBCS</i> 1st Exon  | AAGACCAGCAATGGCAAGGGGA             | TTCCGCTGCTGCGTTGCTCA               | 60             |
| Pr <i>SHMT</i> Promoter  | AGAAGCCGGTTTCCTAGCGCAA             | GAAGAGAGGCTGGGATCGTGT              | 60             |
| Pr <i>SHMT</i> 1st Exon  | TTTTCATCTGGGCATCACTAGTTT           | TTGCCTTCTTCTCCTTCTCAAT             | 62             |
